# Supplementary material for: Adsorption mechanism of different toxic gases onto pristine BNC2 and Al-doped BNC2 monolayers
Source: Royal Society of Chemistry journal article supplement (doi:10.1039/d3cp01145c), 2023-01-01
Supplement: d3cp01145c5.pdf [file d3cp01145c5.pdf]

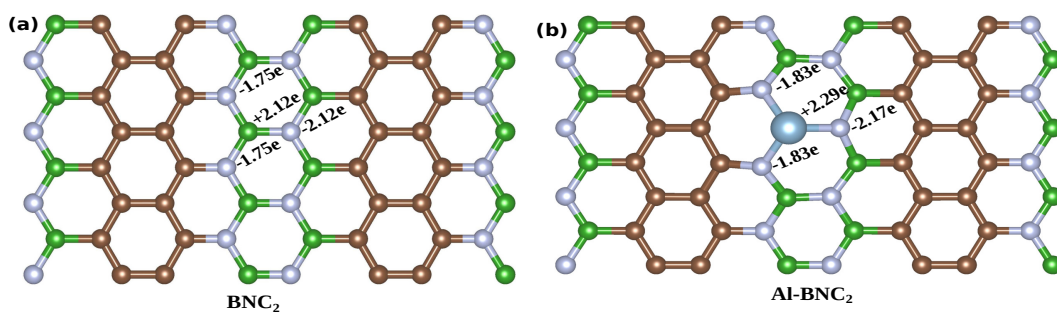

Figure S1: Bader charge analysis of pristine and Al doped BNC<sub>2</sub> Monolayer

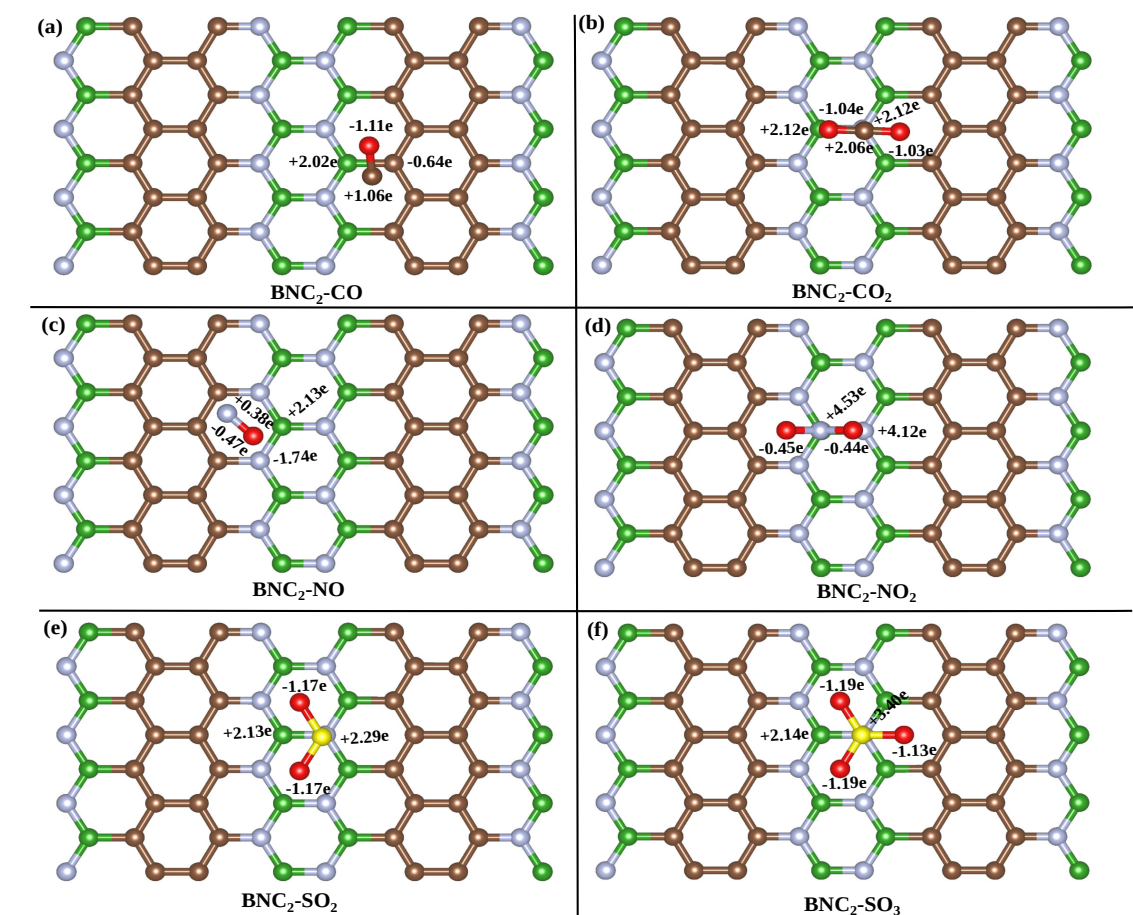

Figure S2: Bader charge analysis of gas adsorption of CO, CO<sub>2</sub>, NO, NO<sub>2</sub>, SO<sub>2</sub>, and SO<sub>3</sub> over pristine BNC<sub>2</sub> Monolayer

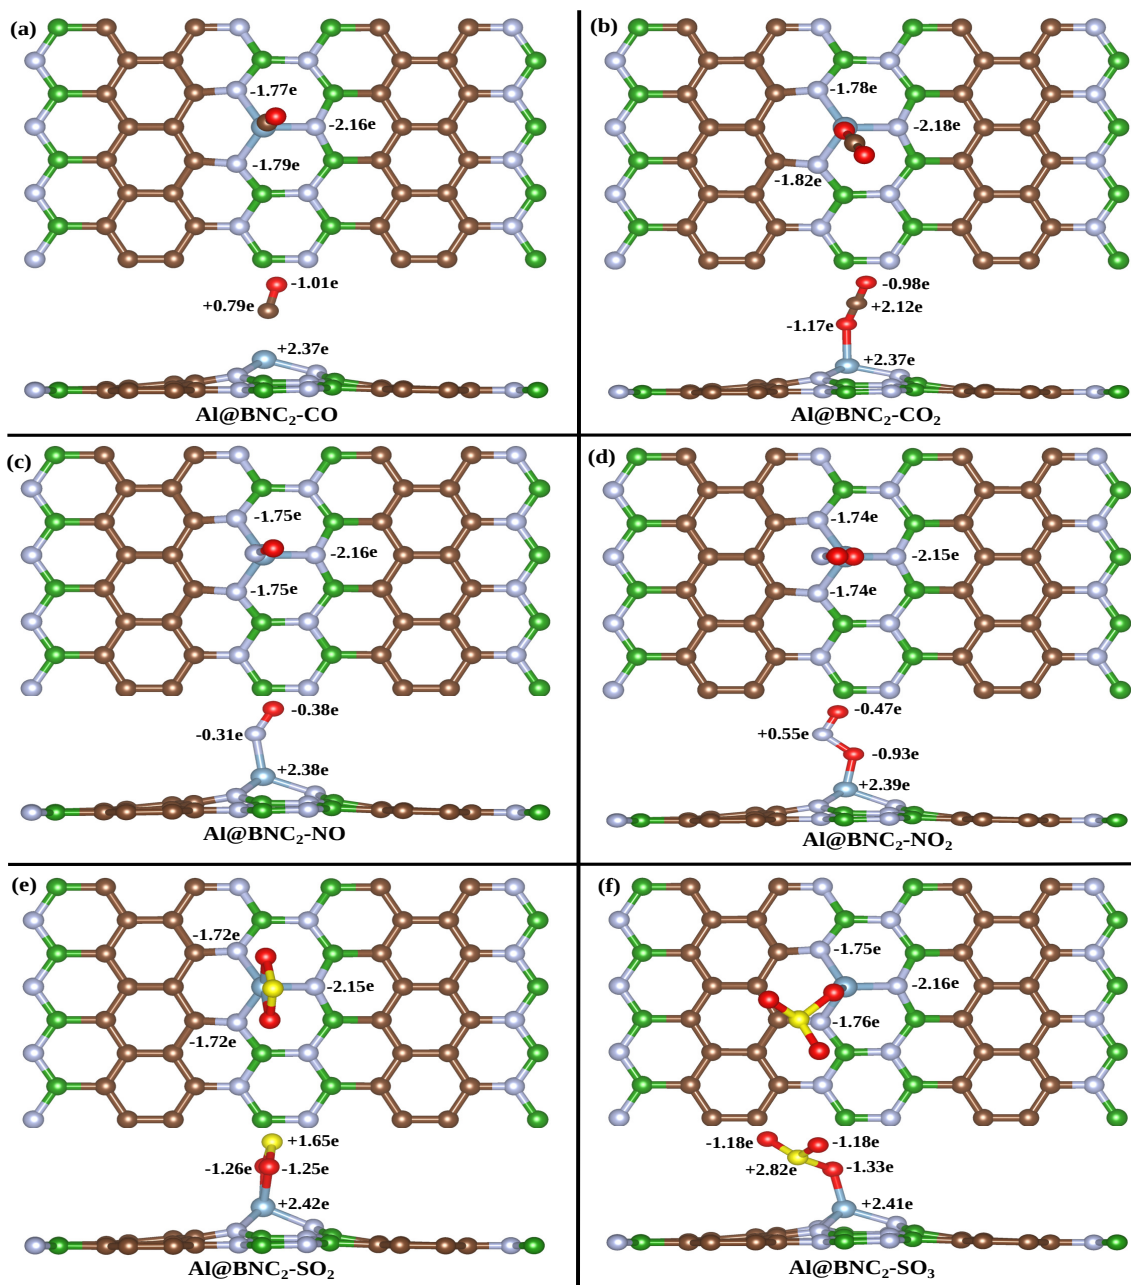

Figure S3: Bader charge analysis of gas adsorption of CO, CO<sub>2</sub>, NO, NO<sub>2</sub>, SO<sub>2</sub>, and SO<sub>3</sub> over Al@BNC<sub>2</sub> Monolayer
